# Supplementary material for: A Simplified Algorithm for Dealing with Inconsistencies Using the Analytic Hierarchy Process
Source: MDPI journal article supplement (doi:10.3390/a15120442), 2022-11-23
Supplement: s1 [file s1]

# Supporting information to accompany: A simplified algorithm for dealing with inconsistencies using the Analytic Hierarchy Process

## R code and associated output used in the study

### Contents

|                                     |    |
|-------------------------------------|----|
| example-script.R .....              | 2  |
| example-script-triad.R .....        | 5  |
| example-script-extreme-triad.R..... | 8  |
| coastal-example.R.....              | 11 |

## example-script.R

2022-10-13

```
### A simplified algorithm for dealing with inconsistency
### using the Analytic Hierarchy Process
###
### Example script for three comparison matrix (A, B, C)

## structure
## 1 AB AC
## BA 1 BC
## CA CB 1

# set the initial values of the comparison matrix
AHP_AB <- 4
AHP_AC <- 6
AHP_BC <- 5

AHP_BA <- 1/AHP_AB
AHP_CA <- 1/AHP_AC
AHP_CB <- 1/AHP_BC

#estimate GMM weights

GMM_A <- (1*AHP_AB*AHP_AC)^(1/3)
GMM_B <- (AHP_BA*1*AHP_BC)^(1/3)
GMM_C <- (AHP_CA*AHP_CB*1)^(1/3)

A_GMM <- GMM_A/(GMM_A+GMM_B+GMM_C)
B_GMM <- GMM_B/(GMM_A+GMM_B+GMM_C)
C_GMM <- GMM_C/(GMM_A+GMM_B+GMM_C)

### estimate initial GCI
n <- 3
GCI <- 2/((n-1)*(n-2))*(((log(AHP_AB*GMM_B/GMM_A))^2)+
                        ((log(AHP_AC*GMM_C/GMM_A))^2)+
                        ((log(AHP_BC*GMM_C/GMM_B))^2))

initial <- cbind(A_GMM,B_GMM,C_GMM, GCI)
GCI

## [1] 0.4831835

#####
# adjust scores to reduce inconsistency #####
#####

NEW_AB <- ifelse(AHP_AC*AHP_CB>9,9,
                 ifelse(AHP_AC*AHP_CB<1/9,1/9,AHP_AC*AHP_CB))
NEW_BA <- 1/NEW_AB
NEW_AC <- ifelse(AHP_AB*AHP_BC>9,9,
                 ifelse(AHP_AB*AHP_BC<1/9,1/9,AHP_AB*AHP_BC))
```

```

NEW_CA <- 1/NEW_AC
NEW_BC <- ifelse(AHP_BA*AHP_AC>9,9,
                 ifelse(AHP_BA*AHP_AC<1/9,1/9,AHP_BA*AHP_AC))
NEW_CB <- 1/NEW_BC

## Look for greatest relative differences

D1 <- ((AHP_AB-NEW_AB)^2)/AHP_AB
D2 <- ((AHP_AC-NEW_AC)^2)/AHP_AC
D3 <- ((AHP_BC-NEW_BC)^2)/AHP_BC

# find maximum value
temp <- as.data.frame(cbind(GCI,D1,D2,D3))
max <- apply(temp[,2:4],1, FUN = function(x) {max(x[x > 0])})

#replace the cell with the maximum difference with the estimated value
AHP_AB <- ifelse(temp$GCI>0.315,ifelse(D1==max, NEW_AB,AHP_AB),AHP_AB)
AHP_BA <- 1/AHP_AB
AHP_AC <- ifelse(temp$GCI>0.315,ifelse(D2==max, NEW_AC,AHP_AC),AHP_AC)
AHP_CA <- 1/AHP_AC
AHP_BC <- ifelse(temp$GCI>0.315,ifelse(D3==max, NEW_BC,AHP_BC),AHP_BC)
AHP_CB <- 1/AHP_BC

#re-estimate GMM weights

GMM_A <- (1*AHP_AB*AHP_AC)^(1/3)
GMM_B <- (1*AHP_BA*AHP_BC)^(1/3)
GMM_C <- (1*AHP_CA*AHP_CB)^(1/3)

A_GMM <- GMM_A/(GMM_A+GMM_B+GMM_C)
B_GMM <- GMM_B/(GMM_A+GMM_B+GMM_C)
C_GMM <- GMM_C/(GMM_A+GMM_B+GMM_C)

#re-estimate GCI

n <- 3
GCI <- 2/((n-1)*(n-2))*(((log(AHP_AB*GMM_B/GMM_A))^2)+
                        ((log(AHP_AC*GMM_C/GMM_A))^2)+
                        ((log(AHP_BC*GMM_C/GMM_B))^2))

revised <-cbind(A_GMM,B_GMM,C_GMM, GCI)

# compare the outputs
initial

##           A_GMM      B_GMM      C_GMM      GCI
## [1,] 0.6733904 0.2514779 0.07513163 0.4831835

revised

```

```
##          A_GMM      B_GMM      C_GMM GCI
## [1,] 0.7058824 0.1764706 0.1176471  0
```

## example-script-triad.R

2022-10-13

```
### A simplified algorithm for dealing with inconsistency
### using the Analytic Hierarchy Process
###
### Example script for three comparison matrix (A, B, C)

## structure
## 1 AB AC
## BA 1 BC
## CA CB 1

# set the initial values of the comparison matrix
AHP_AB <- 4
AHP_AC <- 0.2
AHP_BC <- 5

AHP_BA <- 1/AHP_AB
AHP_CA <- 1/AHP_AC
AHP_CB <- 1/AHP_BC

#estimate GMM weights

GMM_A <- (1*AHP_AB*AHP_AC)^(1/3)
GMM_B <- (AHP_BA*1*AHP_BC)^(1/3)
GMM_C <- (AHP_CA*AHP_CB*1)^(1/3)

A_GMM <- GMM_A/(GMM_A+GMM_B+GMM_C)
B_GMM <- GMM_B/(GMM_A+GMM_B+GMM_C)
C_GMM <- GMM_C/(GMM_A+GMM_B+GMM_C)

### estimate initial GCI
n <- 3
GCI <- 2/((n-1)*(n-2))*(((log(AHP_AB*GMM_B/GMM_A))^2)+
                        ((log(AHP_AC*GMM_C/GMM_A))^2)+
                        ((log(AHP_BC*GMM_C/GMM_B))^2))

initial <- cbind(A_GMM,B_GMM,C_GMM, GCI)
GCI

## [1] 7.069197

#####
# adjust scores to reduce inconsistency #####
#####

NEW_AB <- ifelse(AHP_AC*AHP_CB>9,9,
                 ifelse(AHP_AC*AHP_CB<1/9,1/9,AHP_AC*AHP_CB))
NEW_BA <- 1/NEW_AB
NEW_AC <- ifelse(AHP_AB*AHP_BC>9,9,
                 ifelse(AHP_AB*AHP_BC<1/9,1/9,AHP_AB*AHP_BC))
```

```

NEW_CA <- 1/NEW_AC
NEW_BC <- ifelse(AHP_BA*AHP_AC>9,9,
                ifelse(AHP_BA*AHP_AC<1/9,1/9,AHP_BA*AHP_AC))
NEW_CB <- 1/NEW_BC

cbind(NEW_AB,NEW_AC,NEW_BC)

##          NEW_AB NEW_AC    NEW_BC
## [1,] 0.1111111      9 0.1111111

## Look for greatest relative differences

D1 <- ((AHP_AB-NEW_AB)^2)/AHP_AB
D2 <- ((AHP_AC-NEW_AC)^2)/AHP_AC
D3 <- ((AHP_BC-NEW_BC)^2)/AHP_BC

# find maximum value
temp <- as.data.frame(cbind(GCI,D1,D2,D3))
max <- apply(temp[,2:4],1, FUN = function(x) {max(x[x > 0])})

#replace the cell with the maximum difference with the estimated value
AHP_AB <- ifelse(temp$GCI>0.315,ifelse(D1==max, NEW_AB,AHP_AB),AHP_AB)
AHP_BA <- 1/AHP_AB
AHP_AC <- ifelse(temp$GCI>0.315,ifelse(D2==max, NEW_AC,AHP_AC),AHP_AC)
AHP_CA <- 1/AHP_AC
AHP_BC <- ifelse(temp$GCI>0.315,ifelse(D3==max, NEW_BC,AHP_BC),AHP_BC)
AHP_CB <- 1/AHP_BC

cbind(AHP_AB,AHP_AC,AHP_BC)

##          AHP_AB AHP_AC AHP_BC
## [1,]          4      9      5

#re-estimate GMM weights

GMM_A <- (1*AHP_AB*AHP_AC)^(1/3)
GMM_B <- (1*AHP_BA*AHP_BC)^(1/3)
GMM_C <- (1*AHP_CA*AHP_CB)^(1/3)

A_GMM <- GMM_A/(GMM_A+GMM_B+GMM_C)
B_GMM <- GMM_B/(GMM_A+GMM_B+GMM_C)
C_GMM <- GMM_C/(GMM_A+GMM_B+GMM_C)

#re-estimate GCI

n <- 3
GCI <- 2/((n-1)*(n-2))*(((log(AHP_AB*GMM_B/GMM_A))^2)+
                        ((log(AHP_AC*GMM_C/GMM_A))^2)+
                        ((log(AHP_BC*GMM_C/GMM_B))^2))

revised <-cbind(A_GMM,B_GMM,C_GMM, GCI)

```

```
# compare the outputs  
initial
```

```
##           A_GMM      B_GMM      C_GMM      GCI  
## [1,] 0.3088694 0.3584112 0.3327195 7.069197
```

```
revised
```

```
##           A_GMM      B_GMM      C_GMM      GCI  
## [1,] 0.7085242 0.2311482 0.06032764 0.2125382
```

## example-script-extreme-triad.R

2022-10-13

```
### A simplified algorithm for dealing with inconsistency
### using the Analytic Hierarchy Process
###
### Example script for three comparison matrix (A, B, C)

## structure
## 1 AB AC
## BA 1 BC
## CA CB 1

# set the initial values of the comparison matrix
AHP_AB <- 9
AHP_AC <- 9
AHP_BC <- 9

AHP_BA <- 1/AHP_AB
AHP_CA <- 1/AHP_AC
AHP_CB <- 1/AHP_BC

#estimate GMM weights

GMM_A <- (1*AHP_AB*AHP_AC)^(1/3)
GMM_B <- (AHP_BA*1*AHP_BC)^(1/3)
GMM_C <- (AHP_CA*AHP_CB*1)^(1/3)

A_GMM <- GMM_A/(GMM_A+GMM_B+GMM_C)
B_GMM <- GMM_B/(GMM_A+GMM_B+GMM_C)
C_GMM <- GMM_C/(GMM_A+GMM_B+GMM_C)

### estimate initial GCI
n <- 3
GCI <- 2/((n-1)*(n-2))*(((log(AHP_AB*GMM_B/GMM_A))^2)+
                        ((log(AHP_AC*GMM_C/GMM_A))^2)+
                        ((log(AHP_BC*GMM_C/GMM_B))^2))

initial <- cbind(A_GMM,B_GMM,C_GMM, GCI)
GCI

## [1] 1.609265

#####
# adjust scores to reduce inconsistency #####
#####

NEW_AB <- ifelse(AHP_AC*AHP_CB>9,9,
                 ifelse(AHP_AC*AHP_CB<1/9,1/9,AHP_AC*AHP_CB))
NEW_BA <- 1/NEW_AB
NEW_AC <- ifelse(AHP_AB*AHP_BC>9,9,
                 ifelse(AHP_AB*AHP_BC<1/9,1/9,AHP_AB*AHP_BC))
```



```

NEW_CA <- 1/NEW_AC
NEW_BC <- ifelse(AHP_BA*AHP_AC>9,9,
                ifelse(AHP_BA*AHP_AC<1/9,1/9,AHP_BA*AHP_AC))
NEW_CB <- 1/NEW_BC

## Look for greatest relative differences

D1 <- ((AHP_AB-NEW_AB)^2)/AHP_AB
D2 <- ((AHP_AC-NEW_AC)^2)/AHP_AC
D3 <- ((AHP_BC-NEW_BC)^2)/AHP_BC

# find maximum value
temp <- as.data.frame(cbind(GCI,D1,D2,D3))
max <- apply(temp[,2:4],1, FUN = function(x) {max(x[x > 0])})

#replace the cell with the maximum difference with the estimated value
AHP_AB <- ifelse(temp$GCI>0.315,ifelse(D1==max, NEW_AB,AHP_AB),AHP_AB)
AHP_BA <- 1/AHP_AB
AHP_AC <- ifelse(temp$GCI>0.315,ifelse(D2==max, NEW_AC,AHP_AC),AHP_AC)
AHP_CA <- 1/AHP_AC
AHP_BC <- ifelse(temp$GCI>0.315,ifelse(D3==max, NEW_BC,AHP_BC),AHP_BC)
AHP_CB <- 1/AHP_BC

#re-estimate GMM weights

GMM_A <- (1*AHP_AB*AHP_AC)^(1/3)
GMM_B <- (1*AHP_BA*AHP_BC)^(1/3)
GMM_C <- (1*AHP_CA*AHP_CB)^(1/3)

A_GMM <- GMM_A/(GMM_A+GMM_B+GMM_C)
B_GMM <- GMM_B/(GMM_A+GMM_B+GMM_C)
C_GMM <- GMM_C/(GMM_A+GMM_B+GMM_C)

#re-estimate GCI

n <- 3
GCI <- 2/((n-1)*(n-2))*(((log(AHP_AB*GMM_B/GMM_A))^2)+
                        ((log(AHP_AC*GMM_C/GMM_A))^2)+
                        ((log(AHP_BC*GMM_C/GMM_B))^2))

revised <-cbind(A_GMM,B_GMM,C_GMM, GCI)

# compare the outputs
initial

##           A_GMM      B_GMM      C_GMM      GCI
## [1,] 0.7784906 0.1799251 0.04158436 1.609265

revised

```

```
##           A_GMM      B_GMM      C_GMM      GCI
## [1,] 0.5841564 0.2808331 0.1350105 1.609265
```

## coastal-example.R

2022-10-13

```
####  
### A simplified algorithm for dealing with inconsistencies using AHP  
###  
  
##### Coastal example #####  
  
## 1 AB AC AD  
## BA 1 BC BD  
## CA CB 1 CD  
## DA DB DC 1  
  
##### AHP scores  
data <- read.csv("coastal.csv", header=TRUE)  
  
head(data)  
  
##   X AHP_AB   AHP_AC   AHP_AD AHP_BC AHP_BD AHP_CD  
## 1 1      1 1.0000000 1.0000000    1.0   1.00   1.00  
## 2 2      1 0.2000000 0.3333333    0.2   0.25   5.00  
## 3 3      1 1.0000000 0.3333333    1.0   0.25   1.00  
## 4 4      1 1.0000000 1.0000000    1.0   1.00   1.00  
## 5 5      1 1.0000000 1.0000000    1.0   1.00   1.00  
## 6 6      1 0.3333333 0.3333333    1.0   0.25   0.25  
  
AHP_AB <- data$AHP_AB  
AHP_BA <- 1/AHP_AB  
AHP_AC <- data$AHP_AC  
AHP_CA <- 1/AHP_AC  
AHP_AD <- data$AHP_AD  
AHP_DA <- 1/AHP_AD  
AHP_BC <- data$AHP_BC  
AHP_CB <- 1/AHP_BC  
AHP_BD <- data$AHP_BD  
AHP_DB <- 1/AHP_BD  
AHP_CD <- data$AHP_CD  
AHP_DC <- 1/AHP_CD  
  
## calculate the weights based on the original 1-9 scores  
GMM_A <- (1*AHP_AB*AHP_AC*AHP_AD)^(1/4)  
GMM_B <- (AHP_BA*1*AHP_BC*AHP_BD)^(1/4)  
GMM_C <- (AHP_CA*AHP_CB*1*AHP_CD)^(1/4)  
GMM_D <- (AHP_DA*AHP_DB*AHP_DC*1)^(1/4)  
  
sumval <- (GMM_A+GMM_B+GMM_C+GMM_D)  
  
A_GMM <- GMM_A/sumval  
B_GMM <- GMM_B/sumval  
C_GMM <- GMM_C/sumval  
D_GMM <- GMM_D/sumval
```

```
## calculate the geometric consistency index
```

```
n <- 4
```

```
GCI <- (2/((n-1)*(n-2)))*(((log(AHP_AB*GMM_B/GMM_A))^2)+
  ((log(AHP_AC*GMM_C/GMM_A))^2)+
  ((log(AHP_AD*GMM_D/GMM_A))^2)+
  ((log(AHP_BC*GMM_C/GMM_B))^2)+
  ((log(AHP_BD*GMM_D/GMM_B))^2)+
  ((log(AHP_CD*GMM_D/GMM_C))^2))
```

```
boxplot(cbind(A_GMM,B_GMM,C_GMM,D_GMM),names=c("Shoreline", "Backshore","Intertidal",
"Aquatic"),ylab="Weight",xlab="Beach feature", outline=FALSE)
```

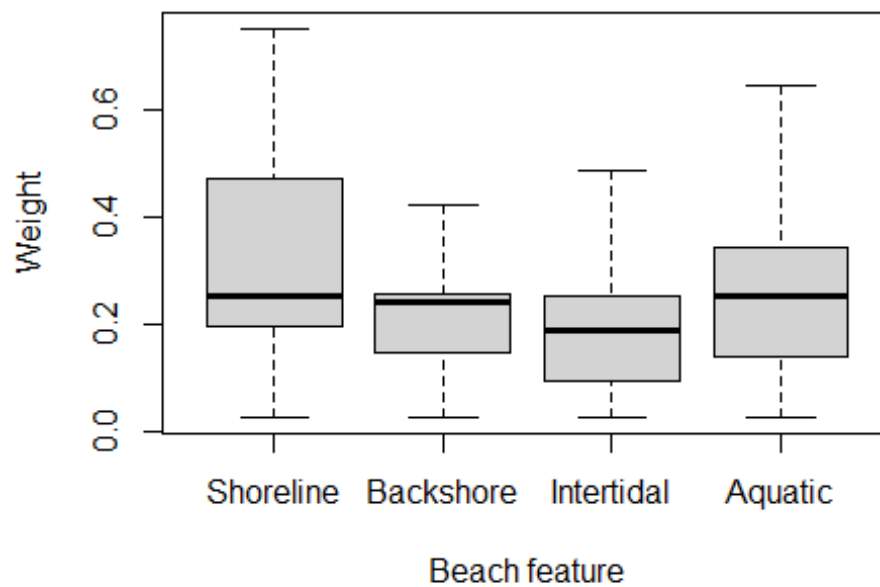

```
original <- as.data.frame(cbind(A_GMM,B_GMM,C_GMM,D_GMM, GCI))
```

```
#####
# adjusting scores to reduce inconsistency #####
#####
```

```
count <- 0
improve1 <- NULL
improve2 <- NULL
```

```
## Loop twenty times ###
for(i in 1:20) {
```

```

## 1  AB AC AD
## BA 1  BC BD
## CA CB 1  CD
## DA DB DC 1

# calculate the expected values as a
# geometric mean of the potential combinations

NEW_AB1 <- ifelse(AHP_AC*AHP_CB>9,9,
                  ifelse(AHP_AC*AHP_CB<1/9,1/9,AHP_AC*AHP_CB))
NEW_AB2 <- ifelse(AHP_AD*AHP_DB>9,9,
                  ifelse(AHP_AD*AHP_DB<1/9,1/9,AHP_AD*AHP_DB))
NEW_AB3 <- ifelse(AHP_AC*AHP_CD*AHP_DB>9,9,
                  ifelse(AHP_AC*AHP_CD*AHP_DB<1/9,1/9,AHP_AC*AHP_CD*AHP_DB))
NEW_AB <- (NEW_AB1*NEW_AB2*NEW_AB3)^(1/3)

NEW_BA <- 1/NEW_AB

NEW_AC1 <- ifelse(AHP_AB*AHP_BC>9,9,
                  ifelse(AHP_AB*AHP_BC<1/9,1/9,AHP_AB*AHP_BC))
NEW_AC2 <- ifelse(AHP_AD*AHP_DC>9,9,
                  ifelse(AHP_AD*AHP_DC<1/9,1/9,AHP_AD*AHP_DC))
NEW_AC3 <- ifelse(AHP_AB*AHP_BD*AHP_DC>9,9,
                  ifelse(AHP_AB*AHP_BD*AHP_DC<1/9,1/9,AHP_AB*AHP_BD*AHP_DC))
NEW_AC <- (NEW_AC1*NEW_AC2*NEW_AC3)^(1/3)

NEW_CA <- 1/NEW_AC

NEW_AD1 <- ifelse(AHP_AB*AHP_BD>9,9,
                  ifelse(AHP_AB*AHP_BD<1/9,1/9,AHP_AB*AHP_BD))
NEW_AD2 <- ifelse(AHP_AC*AHP_CD>9,9,
                  ifelse(AHP_AC*AHP_CD<1/9,1/9,AHP_AC*AHP_CD))
NEW_AD3 <- ifelse(AHP_AB*AHP_BC*AHP_CD>9,9,
                  ifelse(AHP_AB*AHP_BC*AHP_CD<1/9,1/9,AHP_AB*AHP_BC*AHP_CD))
NEW_AD <- (NEW_AD1*NEW_AD2*NEW_AD3)^(1/3)

NEW_DA <- 1/NEW_AD

NEW_BC1 <- ifelse(AHP_BA*AHP_AC>9,9,
                  ifelse(AHP_BA*AHP_AC<1/9,1/9,AHP_BA*AHP_AC))
NEW_BC2 <- ifelse(AHP_BD*AHP_DC>9,9,
                  ifelse(AHP_BD*AHP_DC<1/9,1/9,AHP_BD*AHP_DC))
NEW_BC3 <- ifelse(AHP_BA*AHP_AD*AHP_DC>9,9,
                  ifelse(AHP_BA*AHP_AD*AHP_DC<1/9,1/9,AHP_BA*AHP_AD*AHP_DC))
NEW_BC <- (NEW_BC1*NEW_BC2*NEW_BC3)^(1/3)

NEW_CB <- 1/NEW_BC

```

```

NEW_BD1 <- ifelse(AHP_BC*AHP_CD>9,9,
  ifelse(AHP_BC*AHP_CD<1/9,1/9,AHP_BC*AHP_CD))
NEW_BD2 <- ifelse(AHP_BA*AHP_AD>9,9,
  ifelse(AHP_BA*AHP_AD<1/9,1/9,AHP_BA*AHP_AD))
NEW_BD3 <- ifelse(AHP_BA*AHP_AC*AHP_CD>9,9,
  ifelse(AHP_BA*AHP_AC*AHP_CD<1/9,1/9,AHP_BA*AHP_AC*AHP_CD))
NEW_BD <- (NEW_BD1*NEW_BD2*NEW_BD3)^(1/3)

NEW_DB <- 1/NEW_BD

NEW_CD1 <- ifelse(AHP_CB*AHP_BD>9,9,
  ifelse(AHP_CB*AHP_BD<1/9,1/9,AHP_CB*AHP_BD))
NEW_CD2 <- ifelse(AHP_CA*AHP_AD>9,9,
  ifelse(AHP_AB*AHP_AD<1/9,1/9,AHP_AB*AHP_AD))
NEW_CD3 <- ifelse(AHP_CA*AHP_AB*AHP_BD>9,9,
  ifelse(AHP_CA*AHP_AB*AHP_BD<1/9,1/9,AHP_CA*AHP_AB*AHP_BD))
NEW_CD <- (NEW_CD1*NEW_CD2*NEW_CD3)^(1/3)

NEW_DC <- 1/NEW_CD

D1 <- ((AHP_AB-NEW_AB)^2)/AHP_AB
D2 <- ((AHP_AC-NEW_AC)^2)/AHP_AC
D3 <- ((AHP_BC-NEW_BC)^2)/AHP_BC
D4 <- ((AHP_AD-NEW_AD)^2)/AHP_AD
D5 <- ((AHP_BD-NEW_BD)^2)/AHP_BD
D6 <- ((AHP_CD-NEW_CD)^2)/AHP_CD

# find maximum value
temp <- as.data.frame(cbind(GCI,D1,D2,D3,D4,D5,D6))
max <- apply(temp[,2:7],1, FUN = function(x) {max(x)})
inconsistency <- sum(ifelse(GCI>0.353,1,0))/length(GCI)

AHP_AB <- ifelse(GCI>0.353,ifelse(D1==max, NEW_AB,AHP_AB),AHP_AB)
AHP_BA <- 1/AHP_AB
AHP_AC <- ifelse(GCI>0.353,ifelse(D2==max, NEW_AC,AHP_AC),AHP_AC)
AHP_CA <- 1/AHP_AC
AHP_BC <- ifelse(GCI>0.353,ifelse(D3==max, NEW_BC,AHP_BC),AHP_BC)
AHP_CB <- 1/AHP_BC
AHP_AD <- ifelse(GCI>0.353,ifelse(D4==max, NEW_AD,AHP_AD),AHP_AD)
AHP_DA <- 1/AHP_AD
AHP_BD <- ifelse(GCI>0.353,ifelse(D5==max, NEW_BD,AHP_BD),AHP_BD)
AHP_DB <- 1/AHP_BD
AHP_CD <- ifelse(GCI>0.353,ifelse(D6==max, NEW_CD,AHP_CD),AHP_CD)
AHP_DC <- 1/AHP_CD

GMM_A <- (1*AHP_AB*AHP_AC*AHP_AD)^(1/4)
GMM_B <- (AHP_BA*1*AHP_BC*AHP_BD)^(1/4)
GMM_C <- (AHP_CA*AHP_CB*1*AHP_CD)^(1/4)
GMM_D <- (AHP_DA*AHP_DB*AHP_DC*1)^(1/4)

```

```

sumval <- (GMM_A+GMM_B+GMM_C+GMM_D)

A_GMM <- GMM_A/sumval
B_GMM <- GMM_B/sumval
C_GMM <- GMM_C/sumval
D_GMM <- GMM_D/sumval

checkwt <- (A_GMM+B_GMM+C_GMM+D_GMM)
checkwt

# recalcualte the GCI
n <- 4
GCI <- (2/((n-1)*(n-2)))*(((log(AHP_AB*GMM_B/GMM_A))^2)+
                             ((log(AHP_AC*GMM_C/GMM_A))^2)+
                             ((log(AHP_AD*GMM_D/GMM_A))^2)+
                             ((log(AHP_BC*GMM_C/GMM_B))^2)+
                             ((log(AHP_BD*GMM_D/GMM_B))^2)+
                             ((log(AHP_CD*GMM_D/GMM_C))^2))

adjusted <- as.data.frame(cbind(A_GMM,B_GMM,C_GMM,D_GMM, GCI))

count <- count+1
improve1 <- cbind(count,inconsistency)
improve2 <- rbind(improve2,improve1)
}

# drop the observations with GCI>2 just for the histograms (and see what % is exclude d)
# this is just for the purposes of graphing the result

original1 <- subset(original,GCI<2)
(dim(original)-dim(original1))/dim(original) # check the proportion of obs removed
## [1] 0.04314003 0.00000000

adjusted1 <- subset(adjusted,GCI<2)
(dim(adjusted)-dim(adjusted1))/dim(adjusted) # check the proportion of obs removed
## [1] 0 0

# produce the two histograms

par(mfrow=c(1,2),cex=0.8)
hist(original1$GCI,xlim=c(0,2),breaks=20,main="a) Initial GCI", xlab="GCI",ylim=c(0,1000))
abline(v=0.353,col="red", lty=2, lwd=2)
text(0.38,200,"Critical GCI value",adj=c(0,0))
hist(adjusted1$GCI,xlim=c(0,2),breaks=20,main="b) Final GCI", xlab="GCI",ylim=c(0,1000))
abline(v=0.353,col="red", lty=2, lwd=2)
text(0.38,200,"Critical GCI value",adj=c(0,0))

```

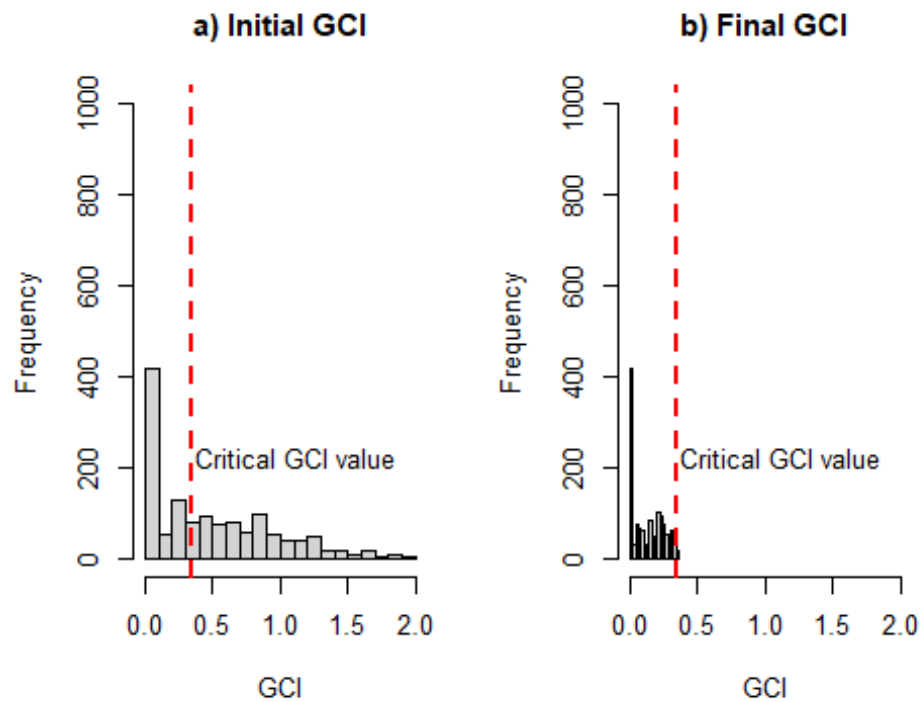

*## do direct comparisons by asset*

```
par(mfrow=c(1,2),cex=0.8)
boxplot(cbind(original$A_GMM,original$B_GMM,original$C_GMM,original$D_GMM),names=c("Shoreline", "Backshore","Intertidal","Aquatic"),ylab="Weight",xlab="Beach feature",outline=FALSE, main="a) Initial weights")
boxplot(cbind(adjusted1$A_GMM,adjusted1$B_GMM,adjusted1$C_GMM,adjusted1$D_GMM),names=c("Shoreline", "Backshore","Intertidal","Aquatic"),ylab="Weight",xlab="Beach feature",outline=FALSE,main="b) adjusted weights")
```



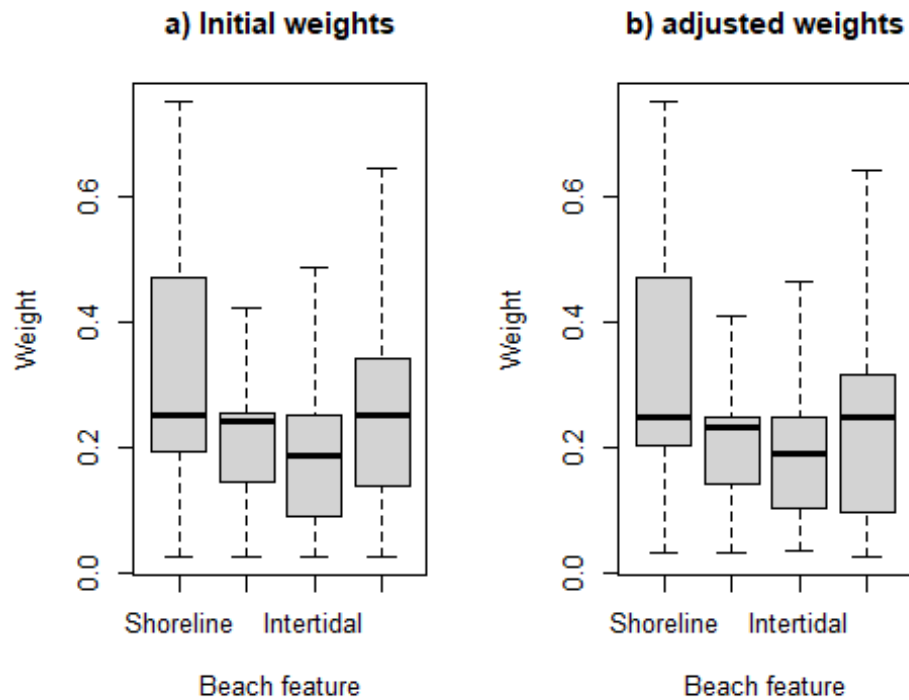

*# summary statistics on original and adjusted values*

summary(original)

```
##      A_GMM      B_GMM      C_GMM      D_GMM
## Min.   :0.0250  Min.   :0.0250  Min.   :0.0250  Min.   :0.0250
## 1st Qu.:0.1942  1st Qu.:0.1439  1st Qu.:0.0918  1st Qu.:0.1382
## Median :0.2500  Median :0.2405  Median :0.1864  Median :0.2500
## Mean   :0.3166  Mean   :0.2318  Mean   :0.1855  Mean   :0.2661
## 3rd Qu.:0.4701  3rd Qu.:0.2555  3rd Qu.:0.2500  3rd Qu.:0.3406
## Max.   :0.7500  Max.   :0.6997  Max.   :0.6789  Max.   :0.7000
##      GCI
## Min.   :0.00000
## 1st Qu.:0.01379
## Median :0.40815
## Mean   :0.60216
## 3rd Qu.:0.87173
## Max.   :5.58507
```

summary(adjusted)

```
##      A_GMM      B_GMM      C_GMM      D_GMM
## Min.   :0.03458  Min.   :0.03422  Min.   :0.03695  Min.   :0.02651
## 1st Qu.:0.20268  1st Qu.:0.14202  1st Qu.:0.10579  1st Qu.:0.09893
## Median :0.25000  Median :0.23356  Median :0.19288  Median :0.25000
## Mean   :0.32991  Mean   :0.23038  Mean   :0.20050  Mean   :0.23921
## 3rd Qu.:0.47222  3rd Qu.:0.25000  3rd Qu.:0.25000  3rd Qu.:0.31631
## Max.   :0.75000  Max.   :0.70888  Max.   :0.66374  Max.   :0.74468
##      GCI
## Min.   :0.0000
## 1st Qu.:0.0000
```

```

## Median :0.1386
## Mean   :0.1336
## 3rd Qu.:0.2293
## Max.   :0.3506

## Look at correlation between the original and adjusted values
cor(as.data.frame(original),as.data.frame(adjusted))

##           A_GMM      B_GMM      C_GMM      D_GMM      GCI
## A_GMM  0.8613313 -0.355939410 -0.094186617 -0.6487119  0.087155711
## B_GMM -0.1909911  0.814367312 -0.118102172 -0.3315410 -0.008524216
## C_GMM -0.5324186 -0.007270329  0.655876804  0.1634843 -0.187054883
## D_GMM -0.5103647 -0.180890386 -0.241910174  0.8952777  0.029623782
## GCI    0.1400396 -0.023765230 -0.002722852 -0.1407087  0.344543536

## count the number of observations that were consistent before and after adjustment
original2 <- subset(original,GCI<0.353)
1-(dim(original)-dim(original2))/dim(original) # check the proportion of obs removed

## [1] 0.4575672 1.0000000

adjusted2 <- subset(adjusted,GCI<0.353)
1-(dim(adjusted)-dim(adjusted2))/dim(adjusted) # check the proportion of obs removed

## [1] 1 1

## distribution of changes in the weights
summary(adjusted/original)

##           A_GMM      B_GMM      C_GMM      D_GMM
## Min.   :0.3328  Min.   :0.2570  Min.   : 0.1837  Min.   :0.0994
## 1st Qu.:1.0000  1st Qu.:0.8842  1st Qu.: 1.0000  1st Qu.:0.7261
## Median :1.0000  Median :1.0000  Median : 1.0000  Median :1.0000
## Mean   :1.1211  Mean   :1.0427  Mean   : 1.3736  Mean   :0.8987
## 3rd Qu.:1.1149  3rd Qu.:1.0000  3rd Qu.: 1.1207  3rd Qu.:1.0000
## Max.   :5.9229  Max.   :3.6209  Max.   :11.4817  Max.   :3.1439
##
##           GCI
## Min.   :0.0000
## 1st Qu.:0.1123
## Median :0.2856
## Mean   :0.4459
## 3rd Qu.:1.0000
## Max.   :1.0000
## NA's   :332

par(mfrow=c(1,1), cex=0.9)
boxplot(adjusted[,1:4]/original[,1:4], outline=FALSE,names=c("Shoreline", "Backshore"
,"Intertidal","Aquatic"),ylab="Relative change in weight (adjusted/initial)",xlab="Be
ach feature")

```

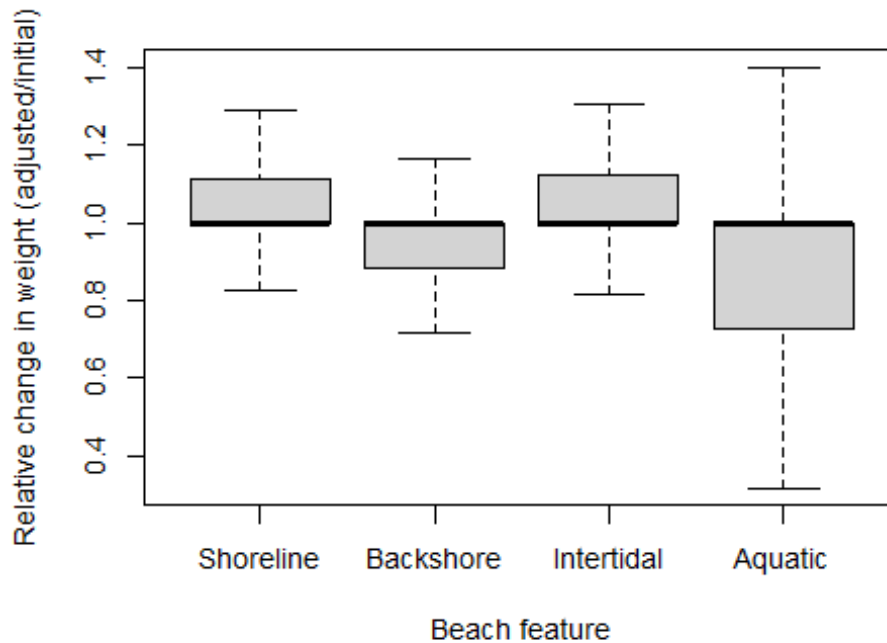

### ### impact on changes in rankings

```
rank_original <- data.frame(original[,1:4], t(apply(-original[,1:4], 1, rank, ties.method='min')))
rank_adjusted <- data.frame(adjusted[,1:4], t(apply(-adjusted[,1:4], 1, rank, ties.method='min')))
```

```
head(rank_original)
```

| ##   | A_GMM      | B_GMM      | C_GMM      | D_GMM      | A_GMM.1 | B_GMM.1 | C_GMM.1 | D_GMM.1 |
|------|------------|------------|------------|------------|---------|---------|---------|---------|
| ## 1 | 0.25000000 | 0.25000000 | 0.25000000 | 0.25000000 | 1       | 1       | 1       | 1       |
| ## 2 | 0.09123701 | 0.0849056  | 0.6003733  | 0.2234841  | 3       | 4       | 1       | 2       |
| ## 3 | 0.17555660 | 0.1633738  | 0.2310455  | 0.4300241  | 3       | 4       | 2       | 1       |
| ## 4 | 0.25000000 | 0.25000000 | 0.25000000 | 0.25000000 | 1       | 1       | 1       | 1       |
| ## 5 | 0.25000000 | 0.25000000 | 0.25000000 | 0.25000000 | 1       | 1       | 1       | 1       |
| ## 6 | 0.11910981 | 0.1458791  | 0.1919877  | 0.5430233  | 4       | 3       | 2       | 1       |

```
head(rank_adjusted)
```

| ##   | A_GMM      | B_GMM      | C_GMM      | D_GMM      | A_GMM.1 | B_GMM.1 | C_GMM.1 | D_GMM.1 |
|------|------------|------------|------------|------------|---------|---------|---------|---------|
| ## 1 | 0.25000000 | 0.25000000 | 0.25000000 | 0.25000000 | 1       | 1       | 1       | 1       |
| ## 2 | 0.09123701 | 0.0849056  | 0.6003733  | 0.2234841  | 3       | 4       | 1       | 2       |
| ## 3 | 0.17555660 | 0.1633738  | 0.2310455  | 0.4300241  | 3       | 4       | 2       | 1       |
| ## 4 | 0.25000000 | 0.25000000 | 0.25000000 | 0.25000000 | 1       | 1       | 1       | 1       |
| ## 5 | 0.25000000 | 0.25000000 | 0.25000000 | 0.25000000 | 1       | 1       | 1       | 1       |
| ## 6 | 0.11910981 | 0.1458791  | 0.1919877  | 0.5430233  | 4       | 3       | 2       | 1       |

```
rank_change <- abs(rank_original[,5:8]-rank_adjusted[,5:8])
rank_change_sum <- round(apply(rank_change,1,sum)/2,0)
par(mfrow=c(1,1), cex=0.9)
hist(rank_change_sum,main="",xlab="Position change of attribute")
```

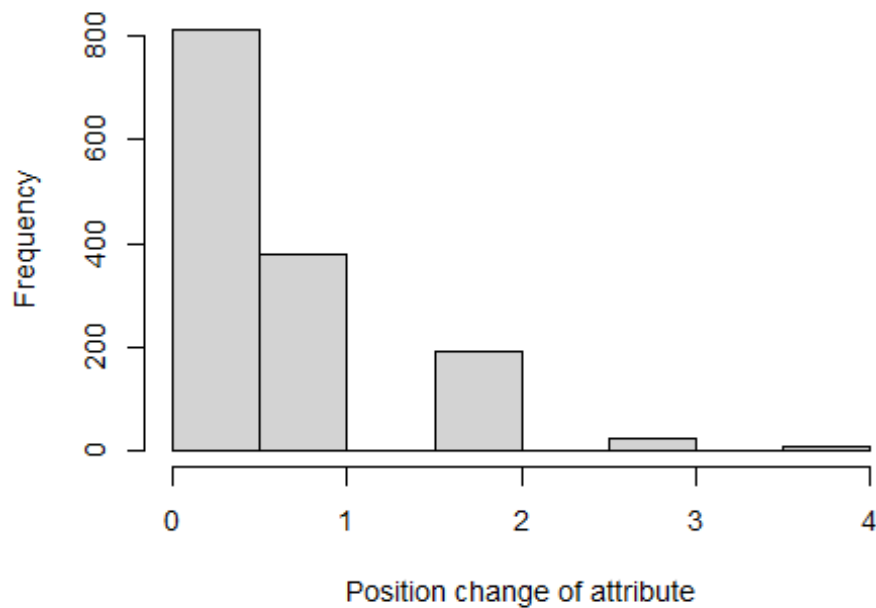

```
table(rank_change_sum)/length(rank_change_sum) # proportion in each change category

## rank_change_sum
##      0      1      2      3      4
## 0.575671853 0.267326733 0.135785007 0.016265912 0.004950495

### number of potential circular triads ####

# number of times the same score was given to all comparisons
ECT2 <- ifelse(data[,2]==data[,3]&data[,3]==data[,4]&data[,4]==data[,5]&data[,5]==data[,6]&data[,6]==data[,7],data[,2],0)
table(ECT2)/length(ECT2)

## ECT2
##      0 0.111111111111111 0.142857142857143 0.166666666666667
## 0.7567185290 0.0035360679 0.0007072136 0.0007072136
## 0.2 0.25 0.333333333333333 0.5
## 0.0014144272 0.0007072136 0.0021216407 0.0021216407
## 1 2 3 4
## 0.2065063649 0.0007072136 0.0056577086 0.0021216407
## 5 6 7 9
## 0.0070721358 0.0014144272 0.0063649222 0.0021216407

# number of times a "positive" score was given to all comparisons
ECT3 <- ifelse(data[,2]>1&data[,3]>1&data[,4]>1&data[,5]>1&data[,6]>1, 1, 0)
table(ECT3)/length(ECT3)

## ECT3
##      0      1
## 0.8670438 0.1329562
```

```

# number of times a "negative" score was given to all comparisons
ECT4 <- ifelse(data[,2]<1&data[,3]<1&data[,4]<1&data[,5]<1&data[,6]<1, 1, 0)
table(ECT4)/length(ECT4)

## ECT4
##           0           1
## 0.92644979 0.07355021

# number of times the expected value changed from positive to negative (or vice versa)
x <- ifelse(log(AHP_AB)>0,ifelse((log(NEW_AB)+log(AHP_AB))/2<log(AHP_AB),1,0),ifelse(
(log(NEW_AB)+log(AHP_AB))/2>log(AHP_AB),1,0))
table(x)/length(x)

## x
##           0           1
## 0.523338 0.476662

y <- ifelse(log(AHP_AC)>0,ifelse((log(NEW_AC)+log(AHP_AC))/2<log(AHP_AC),1,0),ifelse(
(log(NEW_AC)+log(AHP_AC))/2>log(AHP_AC),1,0))
table(y)/length(y)

## y
##           0           1
## 0.5693069 0.4306931

z <- ifelse(log(AHP_AD)>0,ifelse((log(NEW_AD)+log(AHP_AD))/2<log(AHP_AD),1,0),ifelse(
(log(NEW_AD)+log(AHP_AD))/2>log(AHP_AD),1,0))
table(z)/length(z)

## z
##           0           1
## 0.7029703 0.2970297

par(mfrow=c(1,1))
plot(inconsistency*100~count,data=improve2,ylab="Percent inconsistent (%)",xlab="number of iterations")

```

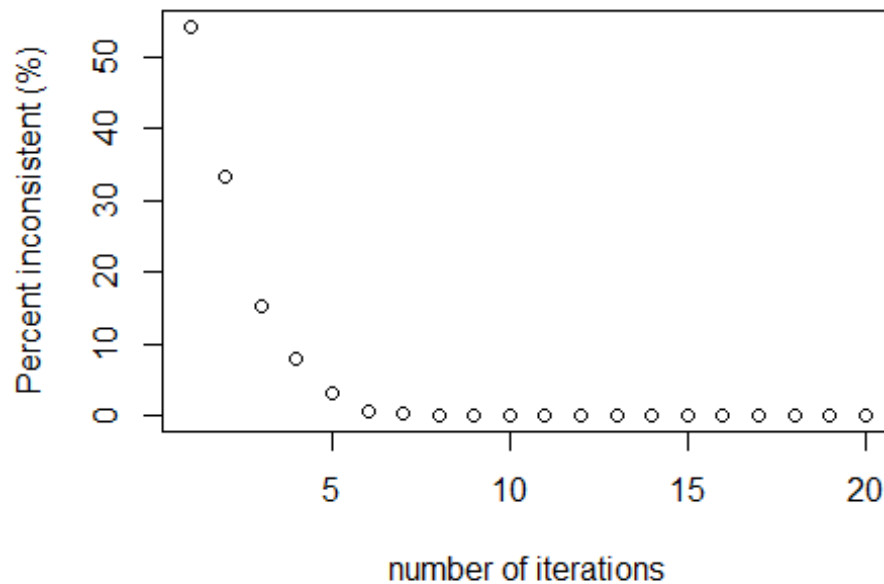

```
improve2[1:20,]
```

```
##      count inconsistency
## [1,]      1  0.542432815
## [2,]      2  0.331683168
## [3,]      3  0.152050919
## [4,]      4  0.079915134
## [5,]      5  0.030410184
## [6,]      6  0.004243281
## [7,]      7  0.001414427
## [8,]      8  0.000000000
## [9,]      9  0.000000000
## [10,]     10  0.000000000
## [11,]     11  0.000000000
## [12,]     12  0.000000000
## [13,]     13  0.000000000
## [14,]     14  0.000000000
## [15,]     15  0.000000000
## [16,]     16  0.000000000
## [17,]     17  0.000000000
## [18,]     18  0.000000000
## [19,]     19  0.000000000
## [20,]     20  0.000000000
```

```
### check for cyclic triads
```

```
D12 <- ifelse(log(NEW_AB)*log(AHP_AB)>0,0,1)
D22 <- ifelse(log(NEW_AC)*log(AHP_AC)>0,0,1)
D32 <- ifelse(log(NEW_BC)*log(AHP_BC)>0,0,1)
D42 <- ifelse(log(NEW_AD)*log(AHP_AD)>0,0,1)
D52 <- ifelse(log(NEW_BD)*log(AHP_BD)>0,0,1)
```

```
D62 <- ifelse(log(NEW_CD)*log(AHP_CD)>0,0,1)
summary(cbind(D12,D22,D32,D42,D52,D62))
```

```
##           D12           D22           D32           D42
## Min.      :0.0000   Min.      :0.0000   Min.      :0.0000   Min.      :0.0000
## 1st Qu.:0.0000   1st Qu.:0.0000   1st Qu.:0.0000   1st Qu.:0.0000
## Median :0.0000   Median :0.0000   Median :0.0000   Median :0.0000
## Mean      :0.3861   Mean      :0.3649   Mean      :0.4279   Mean      :0.3663
## 3rd Qu.:1.0000   3rd Qu.:1.0000   3rd Qu.:1.0000   3rd Qu.:1.0000
## Max.      :1.0000   Max.      :1.0000   Max.      :1.0000   Max.      :1.0000
##           D52           D62
## Min.      :0.000   Min.      :0.0000
## 1st Qu.:0.000   1st Qu.:0.0000
## Median :0.000   Median :0.0000
## Mean      :0.401   Mean      :0.4533
## 3rd Qu.:1.000   3rd Qu.:1.0000
## Max.      :1.000   Max.      :1.0000
```
